# Supplementary material for: [Retracted] Identification of MMP9 as a Novel Biomarker to Mitochondrial Metabolism Disorder and Oxidative Stress in Calcific Aortic Valve Stenosis
Source: Hindawi journal article supplement (doi:10.1155/2022/3858871), 2022-01-01

Mitochondrial membrane potential (JC-1)

Merged

Monomer

Aggregate

CM-VIC

OM-VIC

OM-VIC+  
MMP-9i (100nM)

OM-VIC+  
MMP-9i (300nM)

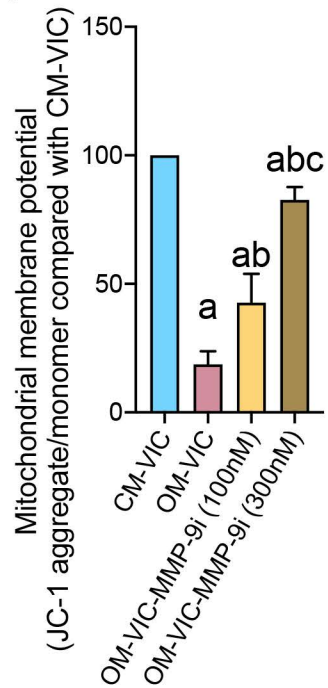

Supplement: f3 [file 3858871.f3.pdf]
