# Supplementary figures and images for: [Retracted] Identification of MMP9 as a Novel Biomarker to Mitochondrial Metabolism Disorder and Oxidative Stress in Calcific Aortic Valve Stenosis
Source: Hindawi journal article supplement (doi:10.1155/2022/3858871), 2022-01-01

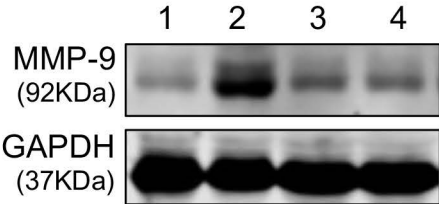

- 1. CM-VIC
- 2. OM-VIC
- 3. OM-VIC+MMP-9i (100nM)
- 4. OM-VIC+MMP-9i (300nM)

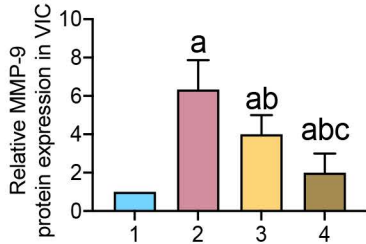

Supplement: f1 [file 3858871.f1.pdf]

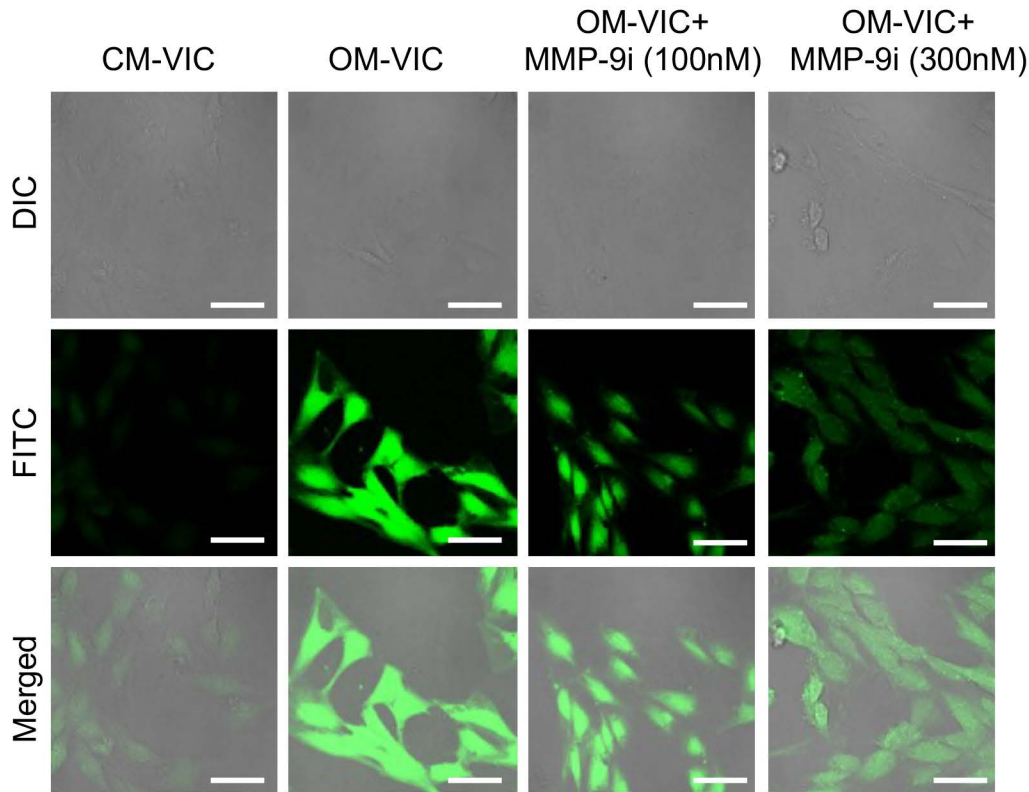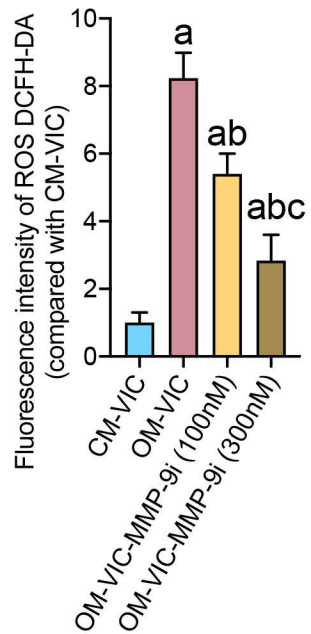

Supplement: f2 [file 3858871.f2.pdf]
